# Supplementary material for: Grazing-induced microbiome alterations drive soil organic carbon turnover and productivity in meadow steppe
Source: PubMed Central journal article supplement (PMC6149009; doi:10.1186/s40168-018-0544-y), 2018-09-20

50% Field capacity

75% Field capacity

100% Field capacity

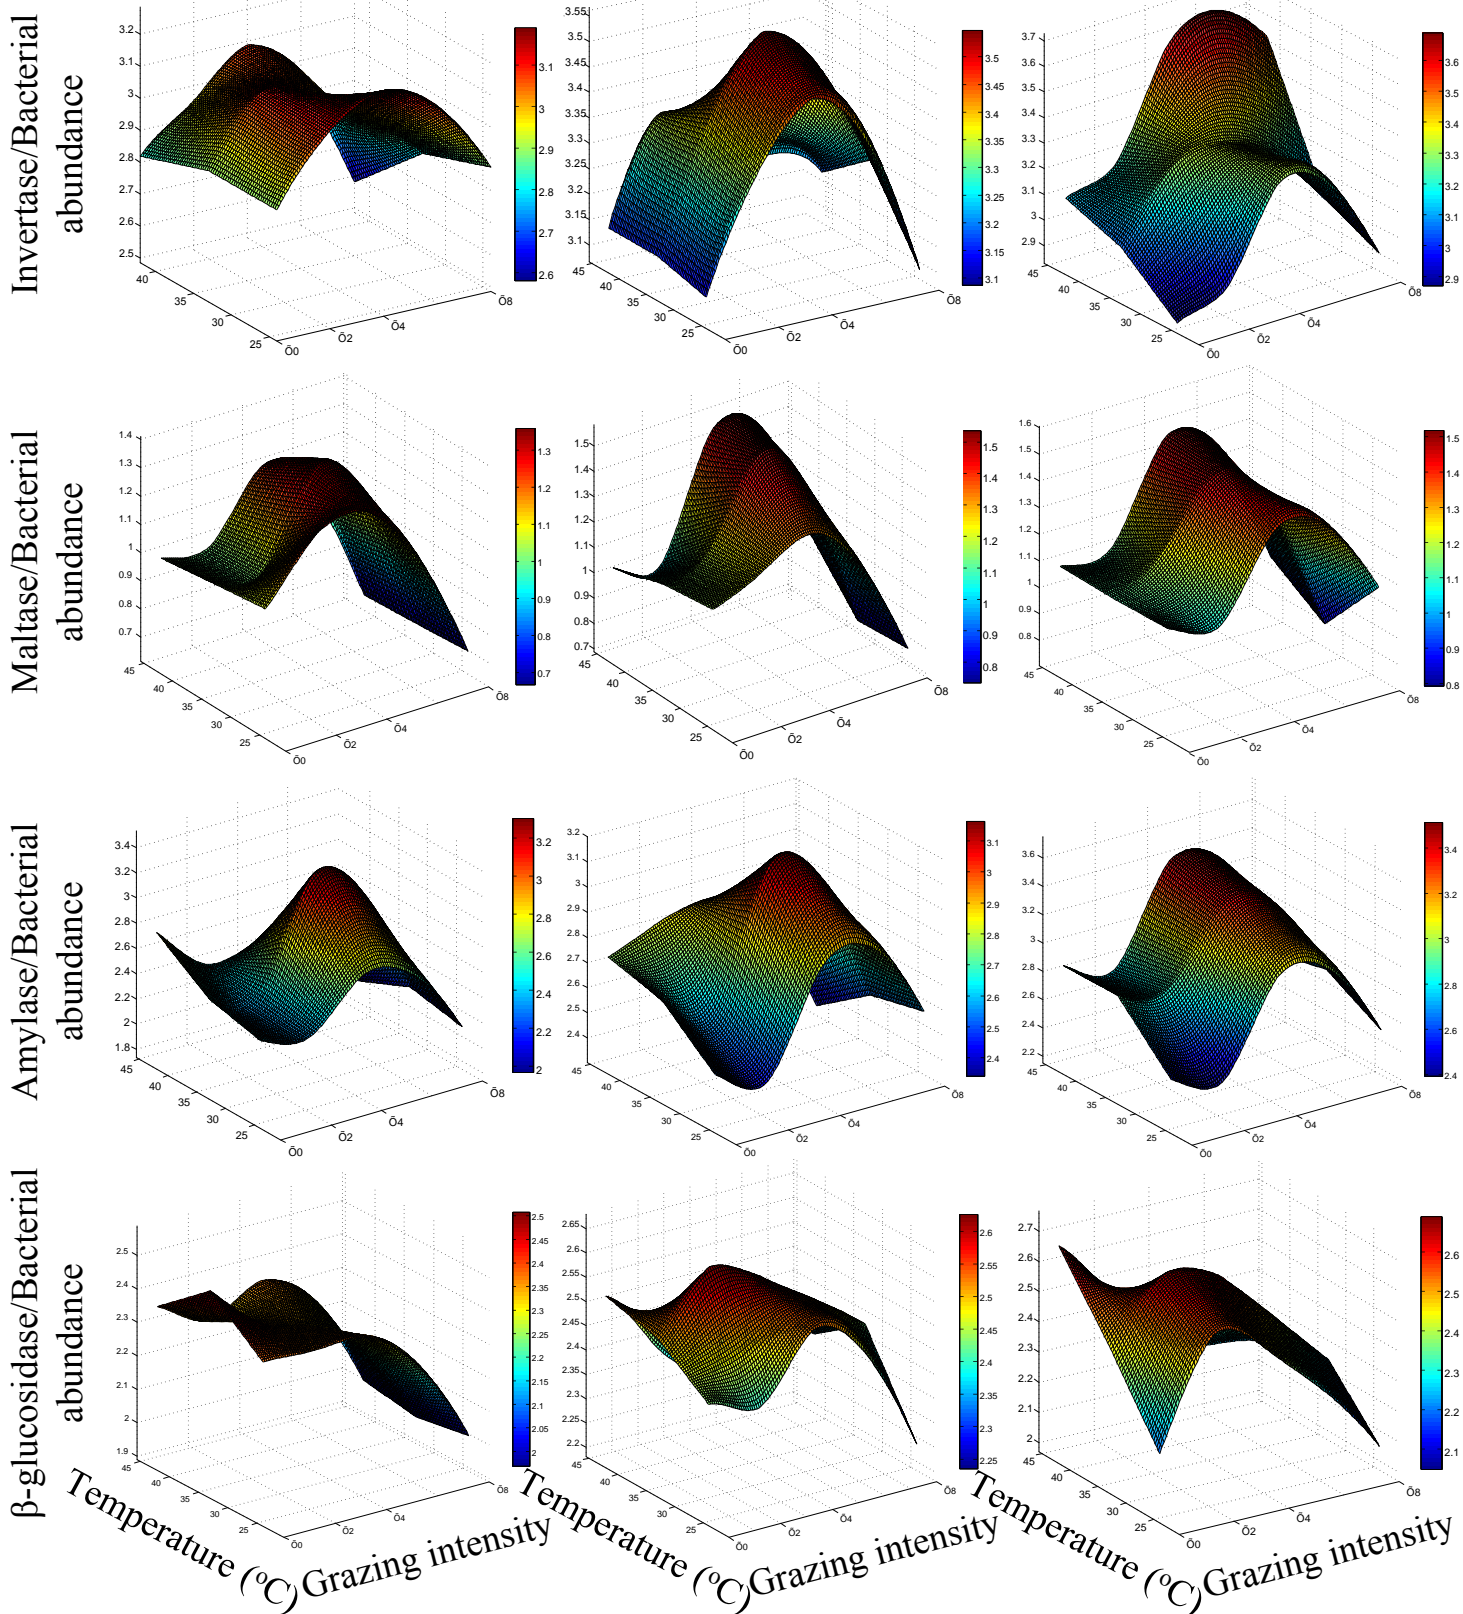

Supplement: 40168_2018_544_MOESM7_ESM.pdf [file 40168_2018_544_MOESM7_ESM.pdf]
